# Supplementary material for: Extract from Aronia melanocarpa, Lonicera caerulea, and Vaccinium myrtillus Improves near Visual Acuity in People with Presbyopia
Source: MDPI journal article supplement (doi:10.3390/nu16070926), 2024-03-23
Supplement: s1 [file s1]

Table S1. Anthocyanin, phenolic acid, iridoid, and flavonol content (mg/100 g fw) of the extract AKB by HPLC.

| No.                         | Compound                                     | Content<br>(mg/100 g) |
|-----------------------------|----------------------------------------------|-----------------------|
| <b>ANTHOCYANINS</b>         |                                              |                       |
| 1                           | Cyanidin 3,5- <i>O</i> -diglucoside          | 990.03                |
| 2                           | Delphinidin 3- <i>O</i> -galactoside         |                       |
| 3                           | Delphinidin 3- <i>O</i> -glucoside           | 741.62                |
| 4                           | Cyanidin 3- <i>O</i> -galactoside            | 12 609.56             |
| 5                           | Delphinidin 3- <i>O</i> -arabinoside         |                       |
| 6                           | Cyanidin 3- <i>O</i> -glucoside              | 9 424.60              |
| 7                           | Cyanidin 3- <i>O</i> -rutinoside             | 6 289.38              |
| 8                           | Cyanidin 3- <i>O</i> -arabinoside            |                       |
| 9                           | Peonidin 3- <i>O</i> -galactoside            | 182.00                |
| 10                          | Petunidin 3- <i>O</i> -arabinoside           |                       |
| 11                          | Pelargonidin 3- <i>O</i> -glucoside          | 548.96                |
| 12                          | Malvidin 3- <i>O</i> -galactoside            |                       |
| 13                          | Cyanidin 3- <i>O</i> -xyloside               | 627.19                |
| 14                          | Peonidin 3- <i>O</i> -arabinoside            | 409.01                |
| 15                          | Malvidin 3- <i>O</i> -glucoside              |                       |
| 16                          | Malvidin 3- <i>O</i> -arabinoside            | 182.93                |
| Other anthocyanins          |                                              | 96.81                 |
| <b>Total anthocyanins</b>   |                                              | <b>32 102.09</b>      |
| <b>PHENOLIC ACIDS</b>       |                                              |                       |
| 1                           | 3-Caffeoylquinic acid                        | 1 939.94              |
| 2                           | 3- <i>O</i> - <i>p</i> -coumaroylquinic acid | 1 124.70              |
| 3                           | 5-Caffeoylquinic acid                        | 3 037.30              |
| 4                           | Coumaroyl iridoid glycosides                 | 320.17                |
| 5                           | Dicaffeoylquinic acid                        | 215.67                |
| 6                           | <i>p</i> -Coumaric acid derivative           | 26.74                 |
| Other phenolic acids        |                                              | 658.29                |
| <b>Total phenolic acids</b> |                                              | <b>7 322.82</b>       |
| <b>IRIDOIDS</b>             |                                              |                       |
| 1                           | loganic acid                                 | 1390.46               |
| 2                           | Loganic acid derivative                      | 521.55                |
| 3                           | Loganin                                      | 2945.89               |
| 4                           | Sweroside                                    |                       |
| 5                           | Loganin derivative                           | 671.51                |
| <b>Total iridoids</b>       |                                              | <b>5529.41</b>        |
| <b>FLAVONOIDS</b>           |                                              |                       |
| 1                           | Quercetin-dihexoside 1                       | 46.38                 |
| 2                           | Quercetin-dihexoside 2                       | 178.42                |
| 3                           | Quercetin 3- <i>O</i> -vicianoside           | 225.37                |
| 4                           | Quercetin 3- <i>O</i> -rutinoside            | 657.66                |
| 5                           | Quercetin 3- <i>O</i> -galactoside           | 812.65                |
| 6                           | Quercetin 3- <i>O</i> -glucoside             |                       |
| 7                           | Quercetin 3- <i>O</i> -glucuronide           | 243.05                |

|                         |                                       |                 |
|-------------------------|---------------------------------------|-----------------|
| 8                       | Quercetin 3- <i>O</i> -robinobioside  |                 |
| 9                       | Quercetin 3- <i>O</i> -pentoside      |                 |
| 10                      | Isorhamnetin pentosylhexoside         | 13.75           |
| 11                      | Isorhamnetin 3- <i>O</i> -vicianoside | 23.99           |
| 12                      | Isorhamnetin rhamnosylhexoside 1      | 26.13           |
| 13                      | Isorhamnetin rhamnosylhexoside 2      | 9.98            |
| 14                      | Myricetin                             | 3.09            |
| <b>Total flavonoids</b> |                                       | <b>2 240.48</b> |
